# Supplementary material for: Population analysis of mortality risk: Predictive models from passive monitors using motion sensors for 100,000 UK Biobank participants
Source: PLOS Digit Health. 2022 Oct 20;1(10):e0000045. doi: 10.1371/journal.pdig.0000045 (PMC9931283; doi:10.1371/journal.pdig.0000045)
Supplement: S2 Table — (DOCX) [file pdig.0000045.s002.docx]

**S2 Table**. **Continuous Encoding of formulas for accelerometer sensor features.**

| Variable Name | Explanation | Formula |
| --- | --- | --- |
| ENMOtrunc | truncated Euclidean Norm Minus One |  |
| ENMOabs | absolute Euclidean Norm Minus One |  |
| Mean  (xMean, yMean, zMean) | Mean of vector magnitude  (x / y / z axis) | (  ) |
| Sd  (xSd, ySd, zSd) | Standard deviation of vector magnitude (x / y / z axis) |  |
| RMS  (xRMS, yRMS, zRMS) | Root Mean Square | (  ) |
| TAC  (xTAC, yTAC, zTAC) | Total Activity | (  ） |
| MCR  (xMCR, yMCR, zMCR) | Mean Cross Rate |  |
| MMCR  (xMMCR, yMMCR, zMMCR) | Maximum and Minimum Average Cross Rate |  |
| MAD | Mean Amplitude Deviation |  |
| MPD | Mean Power Deviation |  |
| Min  (xMin, yMin, zMin) | Minimum of vector | (  ) |
| 25thp  (x25thp, y25thp, z25thp) | 0.25 percentile | 25% rank of  (  25% rank of  ) |
| Median  (xMedian, yMedian, zMedian) | median | 50% rank of  (  50% rank of  ) |
| 75thp  (x75thp, y75thp, z75thp) | 0.75 percentile | 75% rank of  (  75% rank of  ) |
| Max  (xMax, yMax, zMax) | maximum | (  ) |
| xRange / yRange / zRange | Range of x / y / z axis |  |
